# Supplementary material
Source: publisher figshare collection journal article supplement (https://gsajournals.figshare.com/ndownloader/files/23187074)
Supplement: Supplementary file 1 [file 23187074]

|  | RepeatExplorer (Mb) | GenomeScope (Mb) |
| --- | --- | --- |
| *Bembidion* sp.nr. *transversale* DNA2544 | 1,410.4 | 889.0 |
| *Chlaenius sericeus* DNA4821 | 139.6 | 185.9 |
| *Lionepha* *tuulukwa* DNA3782 | 329.7 | 367.1 |

Table S13. Comparison of total repetitive DNA sequence (in Mb) estimated by RepeatExplorer and GenomeScope. Values for RepeatExplorer were extrapolated by multiplying the total fraction of repeats by the genome size estimated with flow cytometry.
